# Supplementary material for: Carbon Nanofibers Decorated by MoS2 Nanosheets with Tunable Quantity as Self-Supporting Anode for High-Performance Lithium Ion Batteries
Source: MDPI journal article supplement (doi:10.3390/nano13192689), 2023-09-30
Supplement: s1 [file s1]

# Carbon Nanofibers Decorated by MoS<sub>2</sub> Nanosheets with Tunable Dispersity as Flexible Self-Supporting Anode for High-Performance Lithium Ion Batteries

Liyan Dang <sup>1,†</sup>, Yapeng Yuan <sup>1,†</sup>, Zongyu Wang <sup>1</sup>, Haowei Li <sup>1</sup>, Rui Yang <sup>1</sup>, Aiping Fu <sup>2</sup>, Xuehua Liu <sup>1</sup> and Hongliang Li <sup>1,\*</sup>

<sup>1</sup> Institute of Materials for Energy and Environment, College of Materials Science and Engineering, State Key Laboratory of Bio-Fibers and Eco-Textiles, Qingdao University, Qingdao 266071, China

<sup>2</sup> College of Chemistry and Chemical Engineering, Qingdao University, Qingdao 266071, China

\* Correspondence: lhl@qdu.edu.cn

† These authors contributed equally to this work.

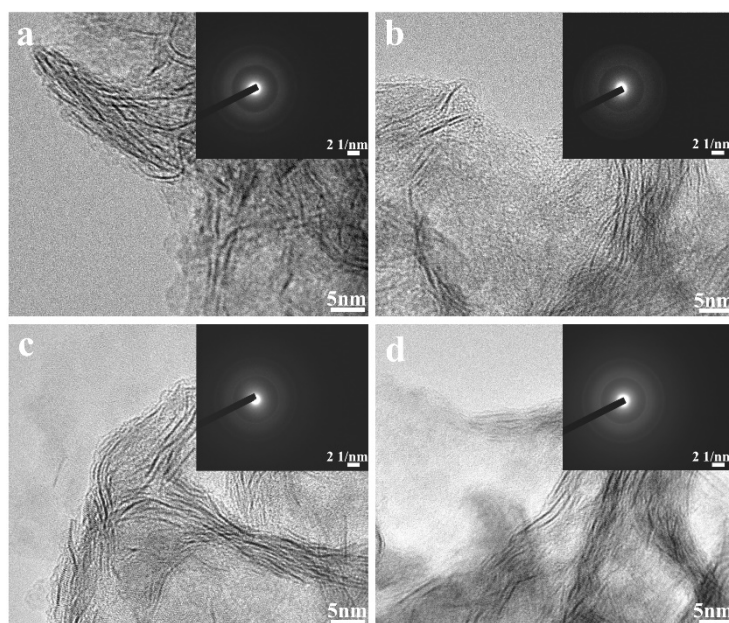

Figure S1. The HRTEM images of (a) CNF//MoS<sub>2</sub>-0.1; (b) CNF//MoS<sub>2</sub>-0.15; (c) CNF//MoS<sub>2</sub>-0.2; (d) CNF//MoS<sub>2</sub>-0.4, the insets show their SAED patterns.

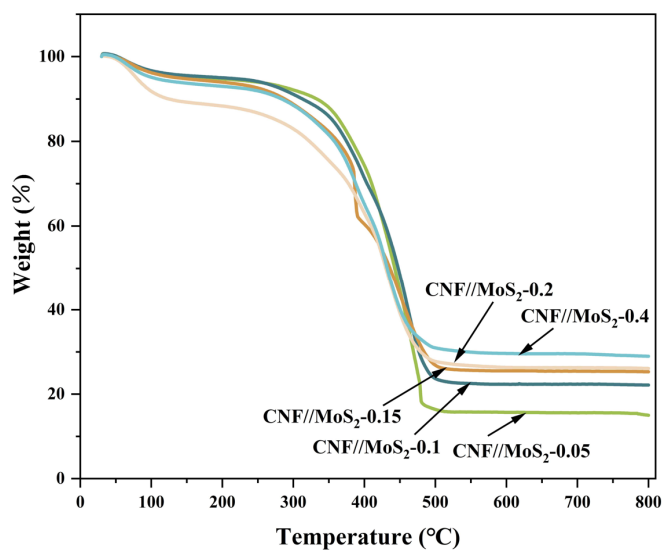

**Figure S2.** TGA curves of CNF//MoS<sub>2</sub>-0.05, CNF//MoS<sub>2</sub>-0.1, CNF//MoS<sub>2</sub>-0.15, CNF//MoS<sub>2</sub>-0.2, and CNF//MoS<sub>2</sub>-0.4.

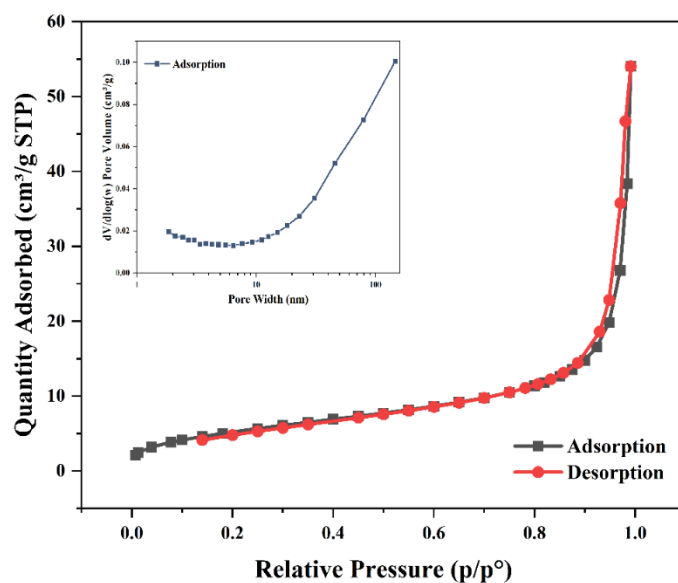

**Figure S3.** The N<sub>2</sub> sorption isotherms, and pore-size distribution curve (the inset) of CNFs.

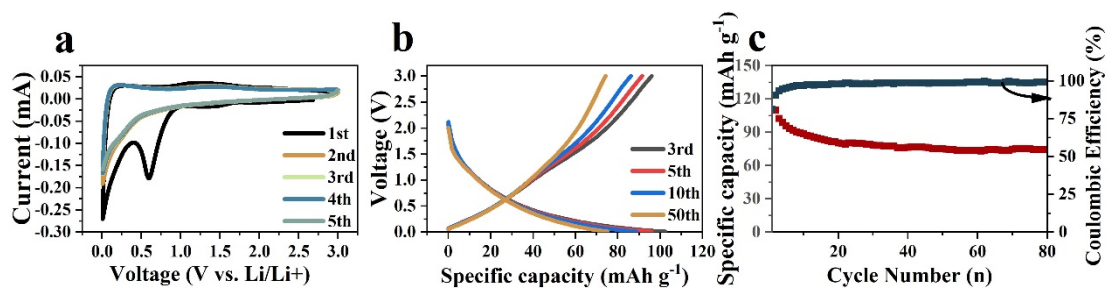

**Figure S4.** (a) CV profiles with a scanning rate of 0.2 mV s<sup>-1</sup> and (b) GCD profiles at 0.2 A g<sup>-1</sup> for

CNFs. (c) Cycling performance of CNFs at  $0.2 \text{ A g}^{-1}$

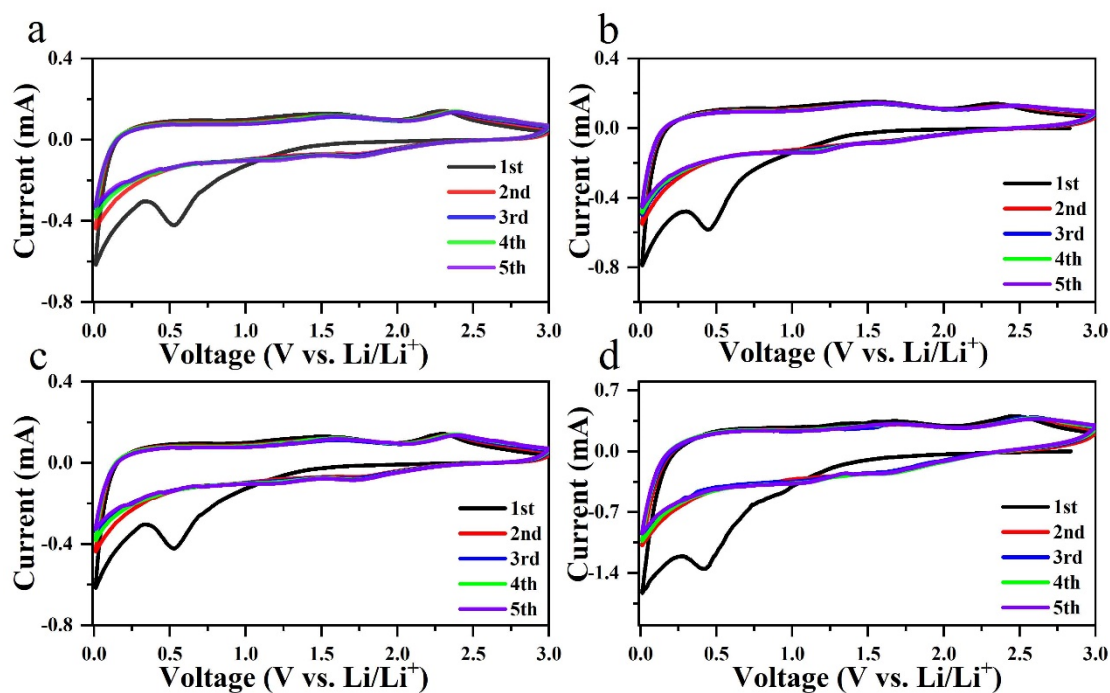

**Figure S5.** CV profiles of (a) CNF//MoS<sub>2</sub>-0.1, (b) CNF//MoS<sub>2</sub>-0.15, (c) CNF//MoS<sub>2</sub>-0.2, (d) CNF//MoS<sub>2</sub>-0.4, respectively.

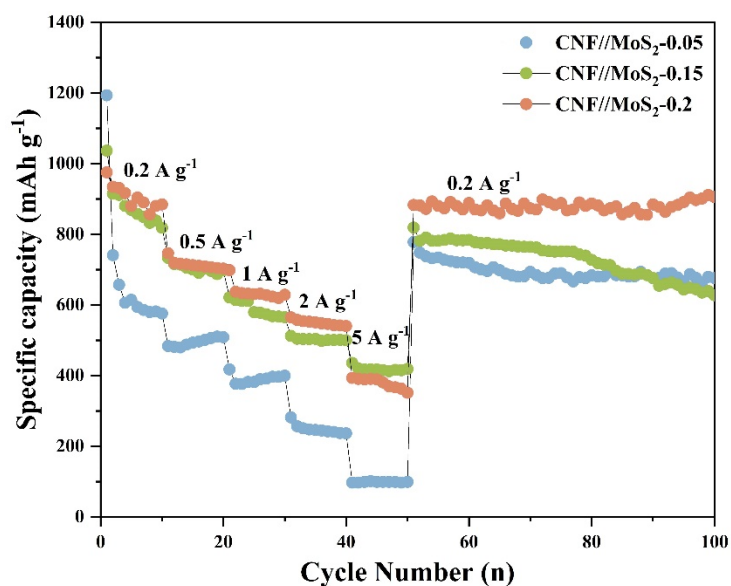

**Figure S6.** Rate performances of CNF//MoS<sub>2</sub>-0.05, CNF//MoS<sub>2</sub>-0.15 and CNF//MoS<sub>2</sub>-0.2.

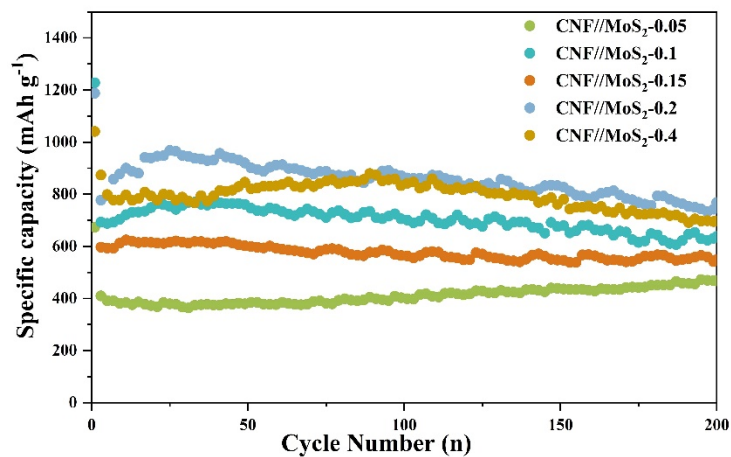

**Figure S7.** Cycling performances of CNF//MoS<sub>2</sub>-0.05, CNF//MoS<sub>2</sub>-0.1, CNF//MoS<sub>2</sub>-0.15, CNF//MoS<sub>2</sub>-0.2, and CNF//MoS<sub>2</sub>-0.4 at current density of 0.5 A g<sup>-1</sup>.

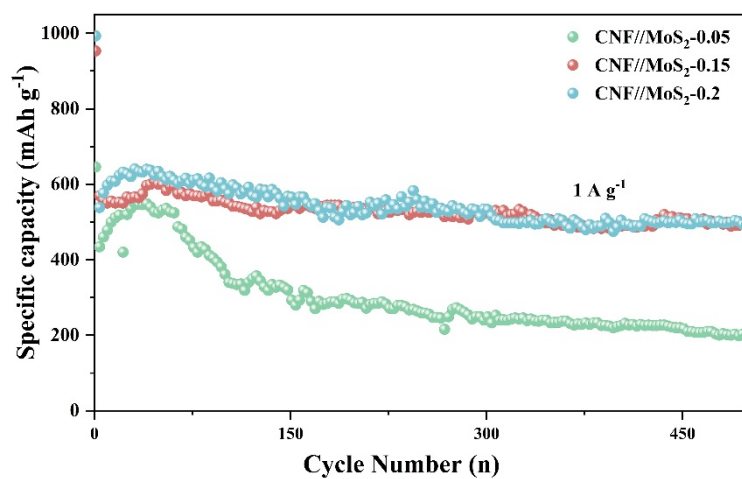

**Figure S8.** Cycling performances of CNF//MoS<sub>2</sub>-0.05, CNF//MoS<sub>2</sub>-0.15 and CNF//MoS<sub>2</sub>-0.2 at current density of 1 A g<sup>-1</sup>.
